# Supplementary material for: Characterization of a Novel Mitovirus of the Sand Fly Lutzomyia longipalpis Using Genomic and Virus–Host Interaction Signatures
Source: MDPI journal article supplement (doi:10.3390/v13010009), 2020-12-23
Supplement: s1 [file s1]

## SUPPLEMENTARY MATERIAL

# Characterization of a novel mitovirus of the sand fly *Lutzomyia longipalpis* using genomic and virus-host interaction signatures

Paula Fonseca<sup>1</sup>, Flavia Ferreira<sup>2</sup>, Felipe da Silva<sup>3</sup>, Liliane Santana Oliveira<sup>4,7</sup>, João Trindade Marques<sup>2,3,5</sup>, Aristóteles Goes-Neto<sup>1,3</sup>, Eric Aguiar<sup>3,6,\*†</sup> and Arthur Gruber<sup>4,7,8\*,†</sup>

<sup>1</sup> Department of Microbiology, Instituto de Ciências Biológicas, Universidade Federal de Minas Gerais, Belo Horizonte MG, 30270-901, Brazil; [camargos.paulaluize@gmail.com](mailto:camargos.paulaluize@gmail.com)

<sup>2</sup> Department of Biochemistry and Immunology, Instituto de Ciências Biológicas, Universidade Federal de Minas Gerais, Belo Horizonte, MG, 30270-901, Brazil; [fvianaferreira@gmail.com](mailto:fvianaferreira@gmail.com)

<sup>3</sup> Bioinformatics Postgraduate Program, Instituto de Ciências Biológicas, Universidade Federal de Minas Gerais, Belo Horizonte, MG, 30270-901, Brazil; [felselva@gmail.com](mailto:felselva@gmail.com), [arigoesneto@gmail.com](mailto:arigoesneto@gmail.com)

<sup>4</sup> Bioinformatics Postgraduate Program, Universidade de São Paulo, São Paulo, SP, 05508-000, Brazil; [liliane.sntn@gmail.com](mailto:liliane.sntn@gmail.com)

<sup>5</sup> Université de Strasbourg, CNRS UPR9022, Inserm U1257, 67084 Strasbourg, France; [jtmarques2009@gmail.com](mailto:jtmarques2009@gmail.com)

<sup>6</sup> Department of Biological Science (DCB), Center of Biotechnology and Genetics (CBG), State University of Santa Cruz (UESC), Rodovia Ilhéus-Itabuna km 16, Ilhéus, BA, 45652-900, Brazil; [ericgdp@gmail.com](mailto:ericgdp@gmail.com)

<sup>7</sup> Department of Parasitology, Instituto de Ciências Biomédicas, Universidade de São Paulo, São Paulo, SP, 05508-000, Brazil; [argruber@usp.br](mailto:argruber@usp.br)

<sup>8</sup> European Virus Bioinformatics Center, Leutragraben 1, Jena, 07743, Germany

\* Correspondence: [ericgdp@gmail.com](mailto:ericgdp@gmail.com) (EA) and [argruber@usp.br](mailto:argruber@usp.br) (AG).

† Both corresponding authors contributed equally to this work.

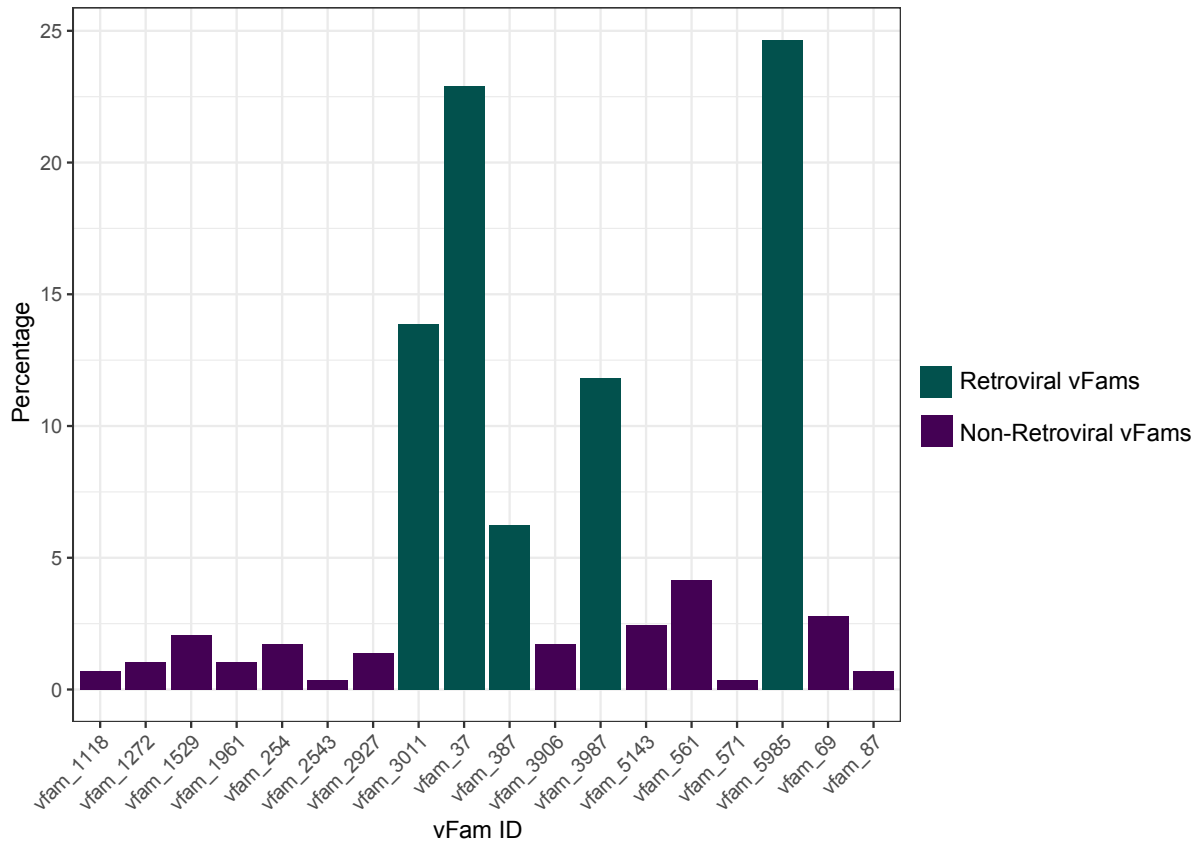

**Figure S1.** Percentage of vFam domains found in the long RNA library of *Lutzomyia longipalpis*. Functional annotation of the contigs obtained by progressive assembly using vFam models as seeds is listed in the Supplementary Table S5.

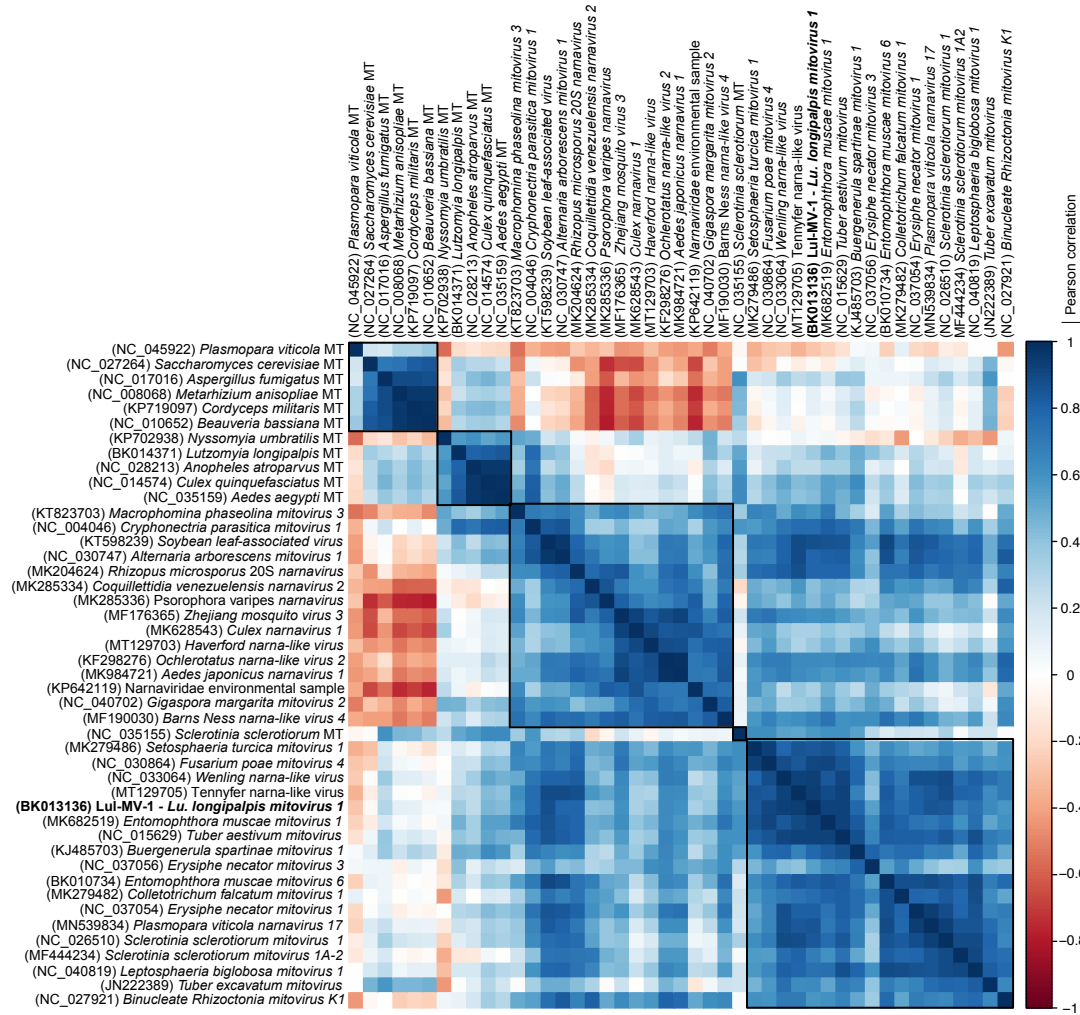

**Figure S2. Comparative analysis of dinucleotide frequencies of the novel virus and putative host genomes.** Correlation plot calculated with `corrplot` program and based on dinucleotide odds ratio of the *Lutzomyia longipalpis* mitovirus 1 (Lul-MV-1), other mitoviruses and mitochondrial genomes (MT) of some fungi and insects. Clustering was performed using K-means method.

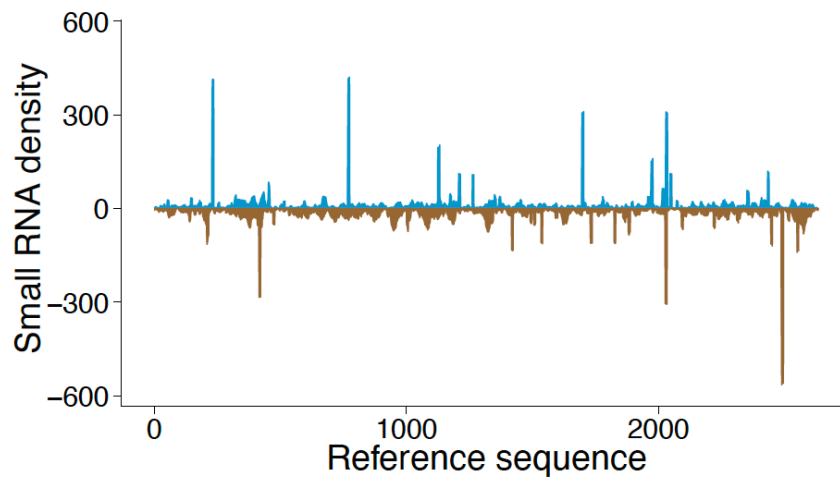

**Figure S3. Distribution of virus-derived small RNAs mapping on the *Lutzomyia longipalpis mitovirus 1* (Lul-MV-1) genome.** Blue and brown colors indicate density of small RNA reads mapped to the positive and negative strands of the viral genome, respectively.

Sequence ID: Query\_137189 Length: 2634 Number of Matches: 1  
Range 1: 1926 to 2409

| Score         | Expect | Identities                                                    | Gaps      | Strand    | Frame |
|---------------|--------|---------------------------------------------------------------|-----------|-----------|-------|
| 767 bits(415) | 0.0()  | 461/484(95%)                                                  | 0/484(0%) | Plus/Plus |       |
| Features:     |        |                                                               |           |           |       |
| Query 1       |        | AGGTCCAGAGGCAGAATATACACTTCCGGTTGGTAAACCAGGAGTATATATTTTCACCTAA |           |           | 60    |
| Sbjct 1926    |        | AGGTCCAGAAGCAGAATATACACTTCCGGTTTGTAAACCAGGAGTATATATTTTCGCCTAA |           |           | 1985  |
| Query 61      |        | GGATTTAATGGAAATTCCATCTTTTTCGAAGATCAGCTACTGATTGGACTAACTTCAAGTC |           |           | 120   |
| Sbjct 1986    |        | AGATTTAATGGAAATTCCATCTTTTTCGAAGATCTGCTACTGATTGAACTAACTTCAAGTC |           |           | 2045  |
| Query 121     |        | ATATATTTTAAGAATAATAATTCATTCTTAATAATATGGTAAATGTTGGAAAAGGTTAT   |           |           | 180   |
| Sbjct 2046    |        | ATATATTTTAAGAATAATAATTCATTCTTAATAATATGGTAAATGTTGGTAAAAGATAT   |           |           | 2105  |
| Query 181     |        | TACCTTAACTACAGATACCAAATTAAGAGGAACTGGAGTATTAAACTTTTATATACTCG   |           |           | 240   |
| Sbjct 2106    |        | AACTTTTACTACAGATACCAAATTAAGAGGAACTGGAGTATTAAACTTTTATATACTCG   |           |           | 2165  |
| Query 241     |        | AAGTTGGGTTAGGATAATTATCTTATCATAATCTGGAATTCATACAGTGAAAGAGGATA   |           |           | 300   |
| Sbjct 2166    |        | AAGTTGGGTTAGGATAATCATTTTATCATAATCTGGAATTCATACAGTGAAAGAGGATA   |           |           | 2225  |
| Query 301     |        | AAGATATGATGGAAAACCATCATTGACCTTTCGTCATCAGACAGATTGGTCAATCTTTAC  |           |           | 360   |
| Sbjct 2226    |        | AAGATATGATGGAAAACCATCATTGACCTTTCGTCATCAGACAGATTGGTCAATCTTTAC  |           |           | 2285  |
| Query 361     |        | CTTTTCACCTGTAAGAAAATACAGTTTGATAAAATTCATATCCTCCTTAAAGCGAGCAAC  |           |           | 420   |
| Sbjct 2286    |        | CTTTTCACCTGTAAGAAAATACAGTTTGATAAAATTTATATCCTCCTTAAATCGAGCAAC  |           |           | 2345  |
| Query 421     |        | AATCATTTCTGGTTGTTGCTTCTTTAAAGATTCTTCTGAACATGATAGAGTCTATTTAG   |           |           | 480   |
| Sbjct 2346    |        | AATCATTTCTGGTTGTTGTTTCTTTAAAGATTCTTCTGAACATGATAGAGTCTATTTAG   |           |           | 2405  |
| Query 481     |        | GACT                                                          |           |           | 484   |
| Sbjct 2406    |        | GACT                                                          |           |           | 2409  |

**Figure S4. Sequence alignment of a fragment of the RdRp gene.** Primers based on the assembled sequence of Lul-MV-1 were designed and used to amplify a 509-bp target of the RdRp gene using total RNA from pools of *Lu. longipalpis* individuals maintained in a laboratory colony. PCR fragments were submitted to Sanger sequencing and aligned to the Lul-MV-1 sequence. The query corresponds to the nucleotide sequence obtained from one of the pools and the subject to the Lul-MV-1 sequence.

**Table S1.** Public RNA libraries of *Lu. longipalpis* analyzed in this study.

| SRA ID     | Strategy   | Number of reads |
|------------|------------|-----------------|
| SRR535766  | long RNAs  | 24,496,036      |
| SRR535767  | long RNAs  | 18,577,781      |
| SRR1803384 | small RNAs | 10,679,412      |
| SRR1803385 | small RNAs | 9,463,241       |
| SRR1803386 | small RNAs | 8,109,613       |
| SRR5224248 | small RNAs | 8,587,131       |
| SRR5224249 | small RNAs | 8,500,448       |
| SRR6429752 | small RNAs | 8,766,757       |

**Table S2.** Public protein sequences used in this work.

| Organism                                                   | Accession number |
|------------------------------------------------------------|------------------|
| <i>Aedes japonicus narnavirus 1</i>                        | QIP67846         |
| <i>Alternaria arborescens mitovirus 1</i>                  | YP_009270635     |
| <i>Aspergillus fumigatus mitovirus 1</i>                   | AXE72932         |
| <i>Barns Ness breadcrumb sponge narna-like virus 4</i>     | ASM94069         |
| <i>Beihai narna-like virus 9</i>                           | YP_009333316     |
| <i>Beihai narna-like virus 18</i>                          | YP_009333315     |
| <i>Binucleate Rhizoctonia mitovirus K1</i>                 | YP_009165597     |
| <i>Buergenerula spartinae mitovirus 1</i>                  | AHY03257         |
| <i>Cassava virus C</i>                                     | YP_003104770     |
| <i>Coquillettidia venezuelensis narnavirus 2</i>           | QBA55487         |
| <i>Cryphonectria parasitica mitovirus 1</i>                | NP_660174        |
| <i>Culex narnavirus 1</i>                                  | QBR53296         |
| <i>Enterobacteria phage MS2</i>                            | YP_009640127     |
| <i>Epirus cherry virus</i>                                 | YP_002019754     |
| <i>Escherichia virus BZ13</i>                              | NP_040755        |
| <i>Fusarium poae mitovirus 4</i>                           | YP_009272901     |
| <i>Grapevine-associated narnavirus 1</i>                   | CEZ26304         |
| <i>Haverford narna-like virus</i>                          | QIJ70061         |
| <i>Hubei narna-like virus 3</i>                            | YP_009337787     |
| <i>Hubei narna-like virus 13</i>                           | YP_009337805     |
| <i>Lutzomyia longipalpis mitovirus 1 (Lul-MV-1)</i>        | BK013136         |
| <i>Mitovirus AEF-2013</i>                                  | AGW51760         |
| <i>Mitovirus JS3</i>                                       | QHA33929.1       |
| <i>Narnaviridae environmental sample</i>                   | AJT39596         |
| <i>Ochlerotatus-associated narna-like virus 1</i>          | AGW51766         |
| <i>Ochlerotatus-associated narna-like virus 2</i>          | AGW51768         |
| <i>Ophiostoma mitovirus 4</i>                              | NP_660179        |
| <i>Ourmia melon virus</i>                                  | YP_002019757     |
| <i>Plasmopara viticola lesion-associated mitovirus 56</i>  | QIR30279         |
| <i>Plasmopara viticola lesion-associated narnavirus 17</i> | QIR30296         |
| <i>Plasmopara viticola lesion-associated mitovirus 23</i>  | QIR30246         |
| <i>Plasmopara viticola lesion-associated mitovirus 39</i>  | QIR30262         |
| <i>Psorophora varipes narnavirus</i>                       | QBA55486         |
| <i>Rhizoctonia solani mitovirus 28</i>                     | QDW65418         |
| <i>Rhizoctonia solani mitovirus 30</i>                     | QDW65420         |
| <i>Rhizopus microsporus 20S narnavirus</i>                 | QBC65280         |
| <i>Rhizopus microsporus 23S narnavirus</i>                 | QBC65281         |
| <i>Saccharomyces 20S RNA narnavirus</i>                    | NP_660178        |
| <i>Saccharomyces 23S RNA narnavirus</i>                    | AAC98708         |
| <i>Sclerotinia sclerotiorum mitovirus 1 HC025</i>          | YP_009121785     |
| <i>Sclerotinia sclerotiorum mitovirus 1-A2</i>             | AWY10962         |
| <i>Setosphaeria turcica mitovirus 1</i>                    | AZT88625         |
| <i>Shahe narna-like virus 6</i>                            | APG77166         |
| <i>Soybean leaf-associated mitovirus 2</i>                 | ALM62242         |
| <i>Tuber excavatum mitovirus</i>                           | AEP83726         |
| <i>Tynnyfer narna-like virus</i>                           | QIJ70064         |
| <i>Wenling narna-like virus 9</i>                          | YP_009337200     |
| <i>Wuhan insect virus 18</i>                               | YP_009342440     |
| <i>Zhejiang mosquito virus 3</i>                           | YP_009333331.1   |

**Table S3.** Public genome sequences used in this work.

| Sample source/organism                                   | Accession number |
|----------------------------------------------------------|------------------|
| <b>Mitochondrial genome</b>                              |                  |
| <i>Aedes aegypti</i>                                     | NC_035159        |
| <i>Anopheles atroparvus</i>                              | NC_028213        |
| <i>Aspergillus fumigatus</i>                             | NC_017016        |
| <i>Beauveria bassiana</i>                                | NC_010652        |
| <i>Cordyceps militaris</i>                               | KP719097         |
| <i>Culex quinquefasciatus</i>                            | NC_014574        |
| <i>Cyberlindnera jadinii</i>                             | NC_022163        |
| <i>Lutzomyia longipalpis</i>                             | BK014371         |
| <i>Metarhizium anisopliae</i>                            | NC_008068        |
| <i>Nyssomyia umbratilis</i>                              | KP702938         |
| <i>Plasmopara viticola</i>                               | NC_045922        |
| <i>Saccharomyces cerevisiae</i>                          | NC_027264        |
| <i>Sclerotinia sclerotiorum</i>                          | NC_035155        |
| <b>Viral genome</b>                                      |                  |
| <i>Aedes japonicus narnavirus 1</i>                      | MK984721         |
| <i>Alternaria arborescens mitovirus 1</i>                | NC_030747        |
| <i>Barns Ness breadcrumb sponge narna-like virus 4</i>   | MF190030         |
| <i>Binucleate Rhizoctonia mitovirus K1</i>               | NC_027921        |
| <i>Buergenerula spartinae mitovirus 1</i>                | KJ485703         |
| <i>Colletotrichum falcatum mitovirus 1</i>               | MK279482         |
| <i>Coquillettidia venezuelensis narnavirus 2</i>         | MK285334         |
| <i>Cryphonectria parasitica mitovirus 1</i>              | NC_004046        |
| <i>Culex narnavirus 1</i>                                | MK628543         |
| <i>Entomophthora muscae mitovirus 6</i>                  | BK010734         |
| <i>Entomophthora muscae mitovirus 7</i>                  | MK682519         |
| <i>Erysiphe necator mitovirus 1</i>                      | NC_037054        |
| <i>Erysiphe necator mitovirus 3</i>                      | NC_037056        |
| <i>Fusarium poae mitovirus 4</i>                         | NC_030864        |
| <i>Gigaspora margarita mitovirus 1</i>                   | NC_040702        |
| <i>Grapevine associated narnavirus 1</i>                 | LN827948         |
| <i>Haverford narna-like virus</i>                        | MT129703         |
| <i>Leptosphaeria biglobosa mitovirus 1</i>               | NC_040819        |
| <i>Lutzomyia longipalpis mitovirus 1 (Lul-MV-1)</i>      | BK013136         |
| <i>Macrophomina phaseolina mitovirus 3</i>               | KT823703         |
| <i>Narnaviridae environmental sample clone</i>           | KP642119         |
| <i>Ochlerotatus-associated narna-like virus 2</i>        | KF298276         |
| <i>Plasmopara viticola lesion-associated mitovirus56</i> | MN539817         |
| <i>Psorophora varipes narnavirus</i>                     | MK285336         |
| <i>Rhizopus microsporus 20S narnavirus</i>               | MK204624         |
| <i>Sclerotinia sclerotiorum mitovirus 1</i>              | NC_026510        |
| <i>Sclerotinia sclerotiorum mitovirus 1-A2</i>           | MF444234         |
| <i>Setosphaeria turcica mitovirus 1</i>                  | MK279486         |
| <i>Shahe narna-like virus 6</i>                          | KX883554         |
| <i>Soybean leaf-associated mitovirus 2</i>               | KT598239         |
| <i>Tuber aestivum mitovirus</i>                          | NC_015629        |
| <i>Tuber excavatum mitovirus</i>                         | JN222389         |
| <i>Tynnyfer narna-like virus</i>                         | MT129705         |
| <i>Wenling narna-like virus 9</i>                        | NC_033064        |
| <i>Zhejiang mosquito virus 3</i>                         | MF176365         |



**Table S4.** Oligonucleotides designed and used in this study.

| Forward primer (5'-3') | Reverse primer (5'-3') | Amplicon size (bp) |
|------------------------|------------------------|--------------------|
| GGAAGATCCATTAGGTCCAG   | CAGGTACACGAAGAGTCCTA   | 509                |

**Table S5.** Functional annotation of the sequences used to build the original vFam\* models utilized as seeds for progressive assembly with GenSeed-HMM program.

| Profile HMM | Functional annotation                       |
|-------------|---------------------------------------------|
| vFam_2927   | DNA-directed RNA polymerase II subunit 1    |
| vFam_2543   | DNA-directed RNA polymerase II subunit RPB5 |
| vFam_5985   | RNA-dependent DNA polymerase                |
| vFam_69     | DNA polymerase                              |
| vFam_37     | Reverse transcriptase                       |
| vFam_387    | Capsid protein                              |
| vFam_3987   | Reverse transcriptase                       |
| vFam_3011   | Reverse transcriptase                       |
| vFam_561    | Nucleoprotein N                             |
| vFam_1529   | Nucleoprotein N                             |
| vFam_5143   | DNA-directed RNA polymerase subunit alpha   |
| vFam_3906   | DNA-directed RNA polymerase subunit alpha   |
| vFam_571    | RNA-dependent RNA polymerase                |
| vFam_1961   | RNA-dependent RNA polymerase                |
| vFam_1272   | RNA-dependent RNA polymerase                |
| vFam_87     | Capsid protein                              |
| vFam_1118   | Capsid protein                              |
| vFam_254    | DNA polymerase                              |

\*vFAM database of profile HMMs (<http://derisilab.ucsf.edu/software/vFam/>).

**Table S6.** Functional annotation of the contigs obtained by progressive assembly using vFam models as seeds.

| <b>vFam seed</b> | <b>Number of<br/>assembled contigs</b> | <b>Function annotation of the coded protein</b>                              |
|------------------|----------------------------------------|------------------------------------------------------------------------------|
| vFam_2927        | 4                                      | Contig 1 – RNA polymerase 2                                                  |
| vFam_2543        | 1                                      | Contig 1 – DNA-dependent RNA polymerase                                      |
| vFam_5985        | 71                                     | Contig 1 – Reverse transcriptase<br>Contig 3 – RNA-dependent DNA polymerase  |
| vFam_69          | 8                                      | Contig 1 – DNA polymerase subunit epsilon<br>Contig 2 – DNA polymerase delta |
| vFam_37          | 66                                     | Contig 1 – Reverse ribonuclease integrase                                    |
| vFam_387         | 18                                     | Contig 1 – Reverse transcriptase<br>Contig 2 – DNA helicase                  |
| vFam_3987        | 34                                     | Contig 1 – Reverse ribonuclease integrase                                    |
| vFam_3011        | 40                                     | Contig 1 – Reverse ribonuclease integrase                                    |
| vFam_5143        | 7                                      | Contig 1 – DNA-dependent RNA polymerase                                      |
| vFam_3906        | 5                                      | Contig 1 – DNA-dependent RNA polymerase                                      |
| vFam_571         | 1                                      | Contig 1 – RNA-dependent RNA polymerase                                      |
| vFam_1961        | 3                                      | Contig 1 – RNA-dependent RNA polymerase                                      |
| vFam_1272        | 3                                      | Contig 1 – RNA-dependent RNA polymerase                                      |
| vFam_87          | 2                                      | Contig 1 – Capsid protein                                                    |
| vFam_1118        | 2                                      | Contig 1 – Capsid protein                                                    |
| vFam_254         | 5                                      | Contig 1 – DNA polymerase                                                    |
| vFam_561         | 12                                     | Contig 1 – Nucleoprotein N                                                   |
| vFam_1529        | 6                                      | Contig 1 – Nucleoprotein N                                                   |

**Table S7.** Use of UGA and UGG codons in coding sequences of some viruses and their putative hosts.

| Accession number                                   | Organism/source                                    | # of UGA / UGG           | % of UGA / UGG                | AT content (%) |
|----------------------------------------------------|----------------------------------------------------|--------------------------|-------------------------------|----------------|
| <b><i>Leviviridae</i></b>                          |                                                    |                          |                               |                |
| NC_001426                                          | <i>Escherichia virus BZ13</i>                      | ***1/26                  | 3.7/96.3                      | 52.14          |
| NC_001417                                          | <i>Escherichia virus MS2</i>                       | 0/23                     | 0.8/100                       | 47.88          |
| NC_000913                                          | <i>Escherichia coli</i> str. K-12 substr. MG1655   | ***167/20886             | 0/100                         | 50.80          |
| <b><i>Botourmiaviridae/Ourmia-like viruses</i></b> |                                                    |                          |                               |                |
| MH192988                                           | <i>Aspergillus fumigatus</i> mitovirus 1           | ***1/19                  | 5.0/95.0                      | 45.02          |
| NC_017016                                          | <i>Aspergillus fumigatus</i> mitochondrion         | 68/5                     | 93.2/6.8                      | 74.52          |
| NC_013111                                          | <i>Cassava virus C</i>                             | 0/17                     | 0/100                         | 50.07          |
| NC_011065                                          | <i>Epirus cherry virus</i>                         | 0/14                     | 0/100                         | 46.42          |
| NC_011068                                          | <i>Ourmia melon virus</i>                          | ***1/14                  | 6.7/93.3                      | 48.47          |
| <b><i>Narnaviridae</i></b>                         |                                                    |                          |                               |                |
| MK984721                                           | <i>Aedes japonicus narnavirus 1</i>                | 0/11 (RdRp)<br>0/9 (HR)  | 0/100<br>(RdRp)<br>0/100 (HR) | 40.83          |
| MF194022                                           | <i>Aedes aegypti</i> mitochondrion                 | 99/3                     | 97.1/2.9                      | 78.96          |
| MK628543                                           | <i>Culex narnavirus 1</i>                          | 0/18 (RdRp)<br>0/7 (HR)  | 0/100<br>(RdRp)<br>0/100 (HR) | 38.54          |
| GU188856                                           | <i>Culex quinquefasciatus</i> mitochondrion        | 94/5                     | 94.9/5.1                      | 78.14          |
| KF298276                                           | <i>Ochlerotatus-associated narna-like virus 2</i>  | 0/15 (RdRp)<br>0/13 (HR) | 0/100<br>(RdRp)<br>0/100 (HR) | 40.24          |
| MT993477                                           | <i>Ochlerotatus caspius</i> mitochondrion**        | 15/0                     | 100/0                         | 70.66          |
| NC_004051                                          | <i>Saccharomyces 20S RNA narnavirus</i>            | ***1/18                  | 5.3/94.7                      | 41.73          |
| NC_004050                                          | <i>Saccharomyces 23S RNA narnavirus</i>            | ***1/20                  | 4.8/95.2                      | 41.02          |
| MK628543                                           | <i>Saccharomyces cerevisiae</i> mitochondrion      | 39/0                     | 100/0                         | 83.87          |
| <b><i>Mitoviridae</i></b>                          |                                                    |                          |                               |                |
| NC_004046                                          | <i>Cryphonectria mitovirus 1</i>                   | 9/8                      | 52.9/47.1                     | 63.42          |
| AF456838                                           | <i>Cryphonectria parasitica</i> mitochondrion**    | 23/5                     | 82.1/17.9                     | 67.95          |
| NC_026510                                          | <i>Sclerotinia sclerotiorum</i> mitovirus 1        | 10/3                     | 76.9/23.1                     | 60.24          |
| MF444234                                           | <i>Sclerotinia sclerotiorum</i> mitovirus 1-A2     | 8/4                      | 66.7/33.3                     | 63.37          |
| KT283062                                           | <i>Sclerotinia sclerotiorum</i> mitochondrion      | 125/29                   | 81.2/18.8                     | 69.10          |
| NC_004052                                          | <i>Ophiostoma</i> mitovirus 4                      | 11/2                     | 84.6/15.4                     | 73.26          |
| KY084297                                           | <i>Ophiostoma novo-ulmi</i> mitochondrion**        | 16/1                     | 94.1/5.9                      | 76.18          |
| BK013136                                           | <i>Lutzomyia longipalpis</i> mitovirus 1           | 11/4                     | 73.3/26.7                     | 69.74          |
| BK013137                                           | <i>Lutzomyia longipalpis</i> mitochondrion         | 99/1                     | 99.0/1.0                      | 78.07          |
| MN539817                                           | <i>Plasmopara viticola</i> associated mitovirus 56 | 11/11                    | 50.0/50.0                     | 57.53          |
| NC_045922                                          | <i>Plasmopara viticola</i> mitochondrion           | ***1/101                 | 1.0/99.0                      | 76.29          |
| KX883554.1                                         | <i>Shahe narna-like virus</i>                      | 0/8                      | 0/100                         | 65.34          |
| NC_033064                                          | <i>Wenling narna-like virus 9</i>                  | 13/1                     | 92.9/7.1                      | 63.84          |

\*Abbreviations: HR - Hypothetical gene coded in the reverse frame; RdRp – RNA-dependent RNA polymerase.

\*\*Incomplete sequence. \*\*\*UGA codon used for signaling translation termination.
