# Supplementary figures and images for: Characterization of a Novel Mitovirus of the Sand Fly Lutzomyia longipalpis Using Genomic and Virus–Host Interaction Signatures
Source: MDPI journal article supplement (doi:10.3390/v13010009), 2020-12-23

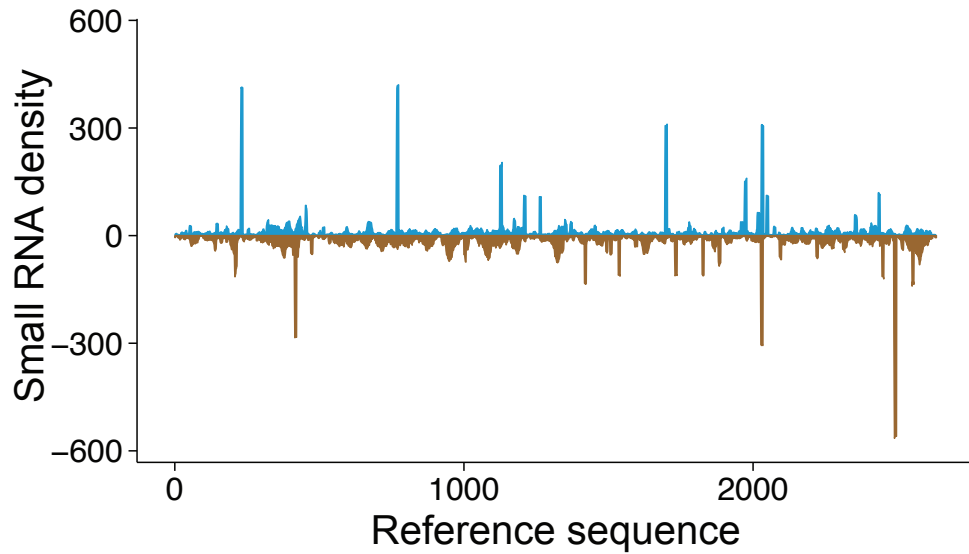

Supplement: s1 [file s1]

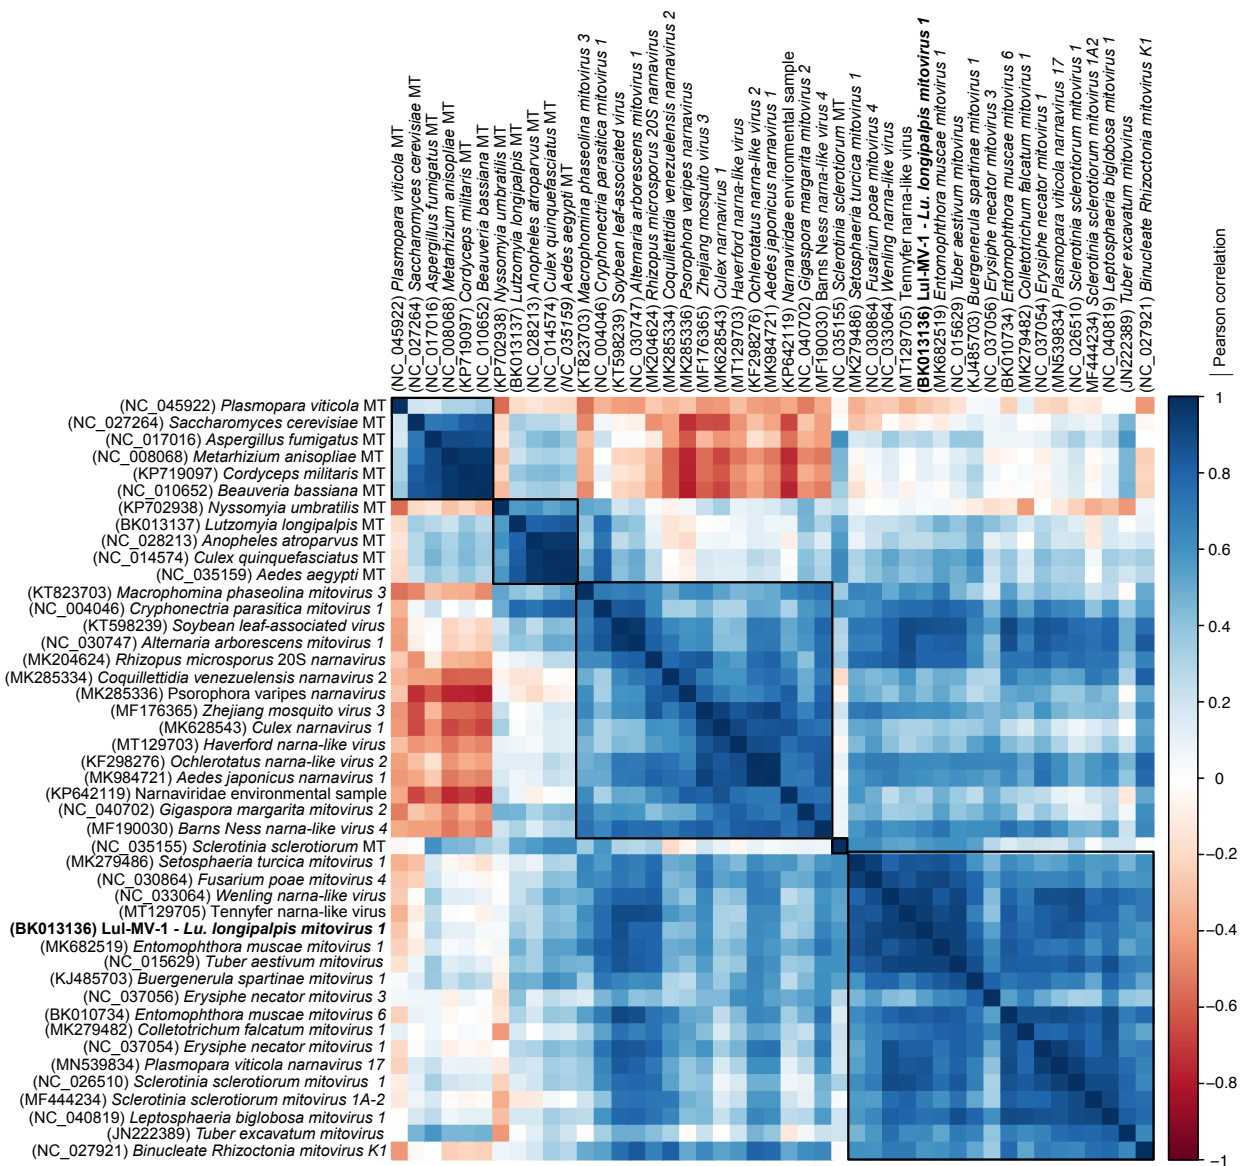

Supplement: s1 [file s1]

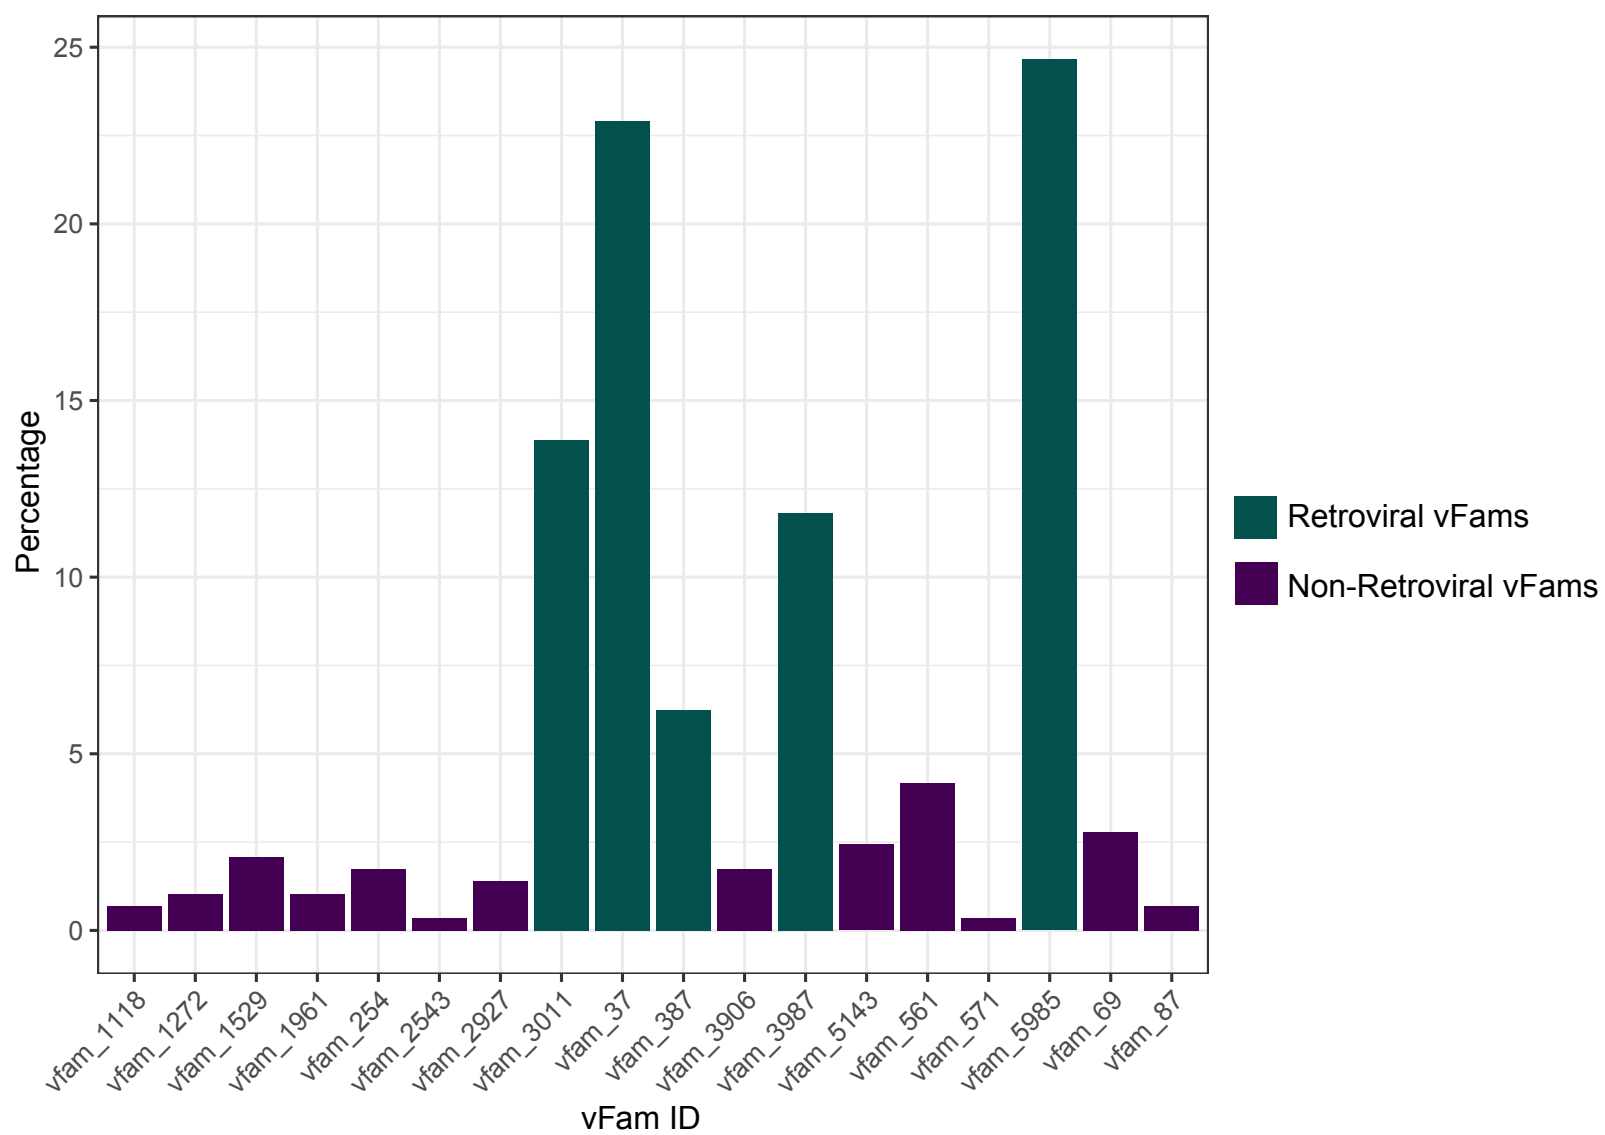

Supplement: s1 [file s1]
